# Supplementary material for: Putrescine Depletion Affects Arabidopsis Root Meristem Size by Modulating Auxin and Cytokinin Signaling and ROS Accumulation
Source: MDPI journal article supplement (doi:10.3390/ijms22084094), 2021-04-15
Supplement: s1 [file s1]

## SUPPLEMENTARY INFORMATION

**Table S1. Primers used in this study**

| Primer name | Sequence                 |
|-------------|--------------------------|
| CKX1-qF     | GTTCCACATCCCTGGCTGAA     |
| CKX1-qR     | TGTTTCTTCCACTTGGATTGATTG |
| CKX4-qF     | CATCTTTGTCCCGGGGTCTC     |
| CKX4-qR     | CGGTTGTTCCATTTGTTTCGG    |
| CKX7-qF     | GTTTGTCAACGGTGCTGACC     |
| CKX7-qR     | AAGAACCGACCCGCAAGATT     |
| ARR5-qF     | TCTACTCGCAGCTAAAACGC     |
| ARR5-qR     | AAGCCGAAAGAATCAGGACA     |
| ACTIN2-qF   | GACCAGCTCTTCCATCGAGAA    |
| ACTIN2-qR   | CAAACGAGGGCTGGAACAAG     |
